# Supplementary material for: Assessment-driven selection and adaptation of exercise difficulty in robot-assisted therapy: a pilot study with a hand rehabilitation robot
Source: PubMed Central journal article supplement (PMC4273449; doi:10.1186/1743-0003-11-154), 2014-11-15
Supplement: 12984_2014_681_MOESM4_ESM.pdf [file 12984_2014_681_MOESM4_ESM.pdf]

A1 – rotational ROM

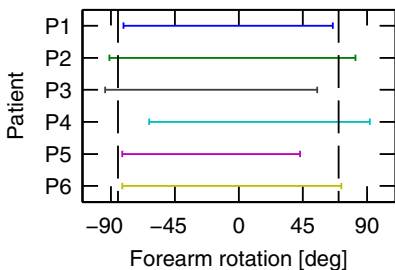

A1 – translational ROM

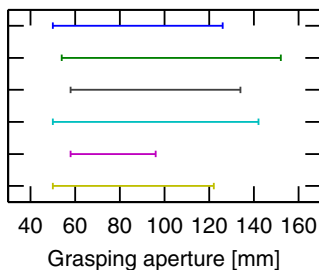

A2 – Proprioception (distance DL)

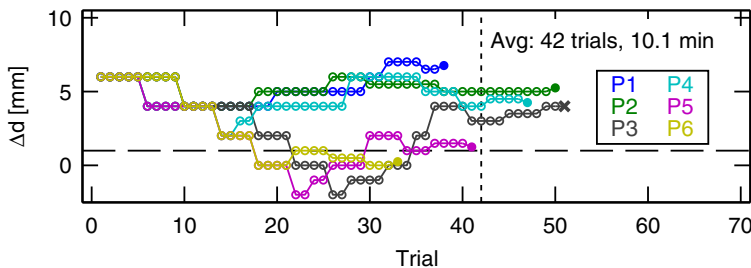

A3 – Haptic perception (stiffness Wf)

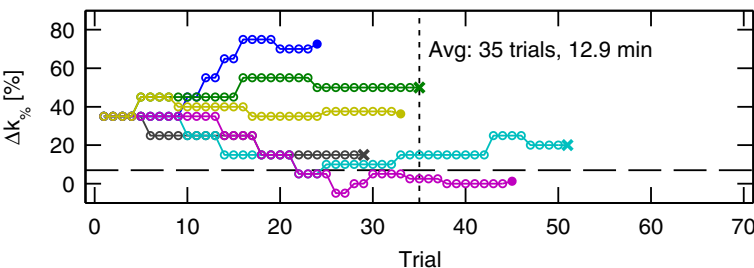

● Convergence

✕

Reached time limit

- - - - - Avg. nbr of trials

— — —

Healthy performance
