# Supplementary material for: Assessment-driven selection and adaptation of exercise difficulty in robot-assisted therapy: a pilot study with a hand rehabilitation robot
Source: PubMed Central journal article supplement (PMC4273449; doi:10.1186/1743-0003-11-154), 2014-11-15

Group level (mean  $\pm$  std)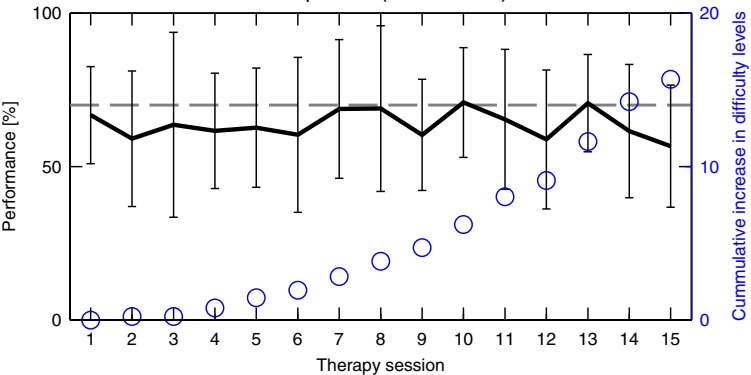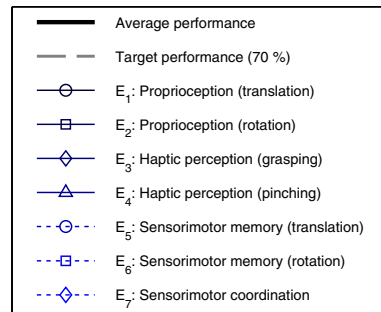

Patient P4

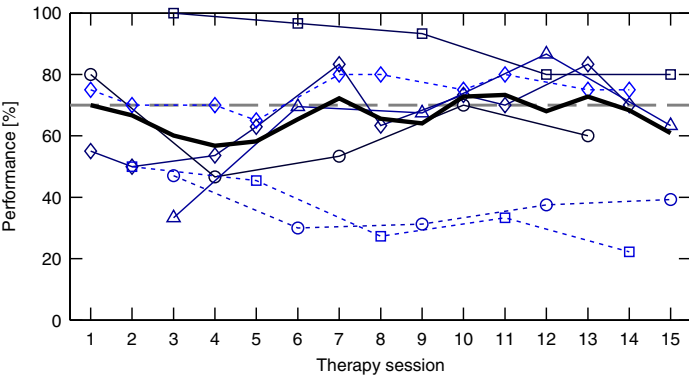

Patient P4

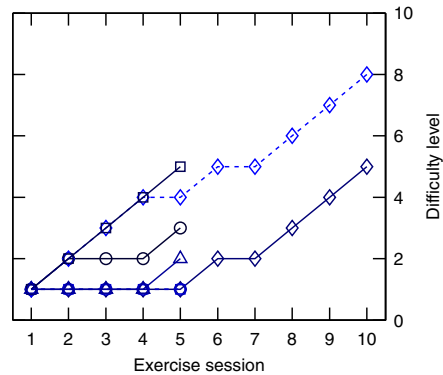

Supplement: 12984_2014_681_MOESM5_ESM.pdf [file 12984_2014_681_MOESM5_ESM.pdf]
