# Supplementary material for: Assessment-driven selection and adaptation of exercise difficulty in robot-assisted therapy: a pilot study with a hand rehabilitation robot
Source: PubMed Central journal article supplement (PMC4273449; doi:10.1186/1743-0003-11-154), 2014-11-15

$\Delta$  FMA-UE  
 $r_s=0.70, p=0.15$

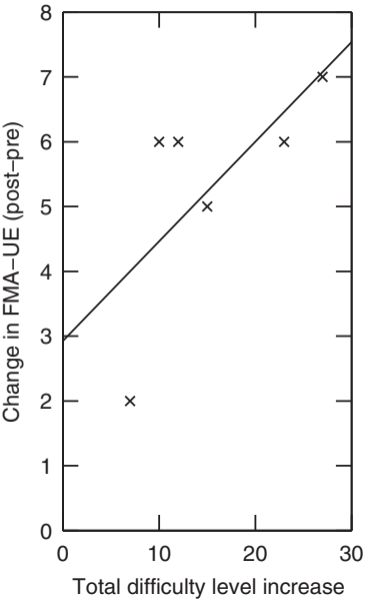

$\Delta$  FMA hand/wrist  
 $r_s=0.85, p=0.04$

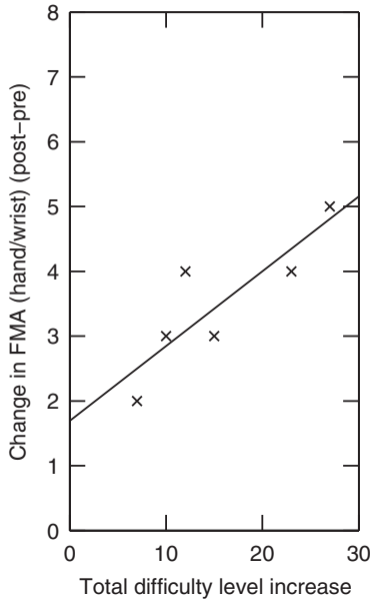

Supplement: 12984_2014_681_MOESM7_ESM.pdf [file 12984_2014_681_MOESM7_ESM.pdf]
